# Supplementary material
Source: PubMed Central journal article supplement (PMC11587783)
Supplement: NIHMS2031158-supplement-Supplemental_1.pdf [file NIHMS2031158-supplement-Supplemental_1.pdf]

**TABLE A1.** Results of statistical models assessing the associations between individual eCAP metrics and CNC word scores measured in three listening conditions.

| Listening condition | eCAP metric | Regression coefficient | T value | P value | FDR P value | R <sup>2</sup> |
|---------------------|-------------|------------------------|---------|---------|-------------|----------------|
| Quiet               | ENI index   | 0.68                   | 1.38    | 0.182   | 0.546       | 0.08           |
|                     | NA ratio    | 4.67                   | 0.16    | 0.872   | 0.883       | 0.00           |
|                     | NA speed    | 0.23                   | 0.99    | 0.331   | 0.664       | 0.04           |
|                     | AR ratio    | -9.83                  | -0.31   | 0.760   | 0.883       | 0.00           |
|                     | AR speed    | -0.33                  | -1.75   | 0.095   | 0.450       | 0.12           |
|                     | AM ratio    | -19.57                 | -0.70   | 0.490   | 0.735       | 0.02           |
| +10 dB SNR          | ENI index   | 0.73                   | 1.72    | 0.100   | 0.450       | 0.12           |
|                     | NA ratio    | -3.79                  | -0.15   | 0.883   | 0.735       | 0.00           |
|                     | NA speed    | 0.21                   | 0.99    | 0.332   | 0.450       | 0.04           |
|                     | AR ratio    | 4.93                   | 0.18    | 0.863   | 0.883       | 0.00           |
|                     | AR speed    | -0.27                  | -1.58   | 0.127   | 0.664       | 0.10           |
|                     | AM ratio    | -19.57                 | -0.70   | 0.490   | 0.883       | 0.02           |
| +5 dB SNR           | ENI index   | 1.06                   | 2.12    | 0.046   | 0.457       | 0.17           |
|                     | NA ratio    | 5.07                   | 0.16    | 0.871   | 0.735       | 0.00           |
|                     | NA speed    | 0.27                   | 1.08    | 0.290   | 0.414       | 0.05           |
|                     | AR ratio    | 16.04                  | 0.47    | 0.642   | 0.883       | 0.01           |
|                     | AR speed    | -0.56                  | -3.06   | 0.006   | 0.108       | 0.30           |
|                     | AM ratio    | -26.14                 | -0.88   | 0.388   | 0.695       | 0.03           |

eCAP, electrically evoked compound action potential; CNC, Consonant-Nucleus-Consonant; SNR, signal-to-noise ratio; ENI, electrode neuron interface; NA, neural adaptation; AR, adaptation recovery; AM, amplitude modulation; FDR, false discovery rate

**TABLE A2.** Results of statistical models assessing the associations between individual eCAP metrics and AzBio sentence scores measured in three listening conditions.

| Listening condition | eCAP metric | Regression coefficient | T value | P value | FDR P value | R <sup>2</sup> |
|---------------------|-------------|------------------------|---------|---------|-------------|----------------|
| Quiet               | ENI index   | 0.66                   | 1.56    | 0.133   | 0.479       | 0.10           |
|                     | NA ratio    | 32.77                  | 1.37    | 0.183   | 0.549       | 0.08           |
|                     | NA speed    | 0.20                   | 0.99    | 0.332   | 0.664       | 0.04           |
|                     | AR ratio    | 6.22                   | 0.23    | 0.823   | 0.871       | 0.00           |
|                     | AR speed    | -0.33                  | -2.08   | 0.049   | 0.294       | 0.16           |
|                     | AM ratio    | 13.83                  | 0.57    | 0.572   | 0.735       | 0.01           |
| +10 dB SNR          | ENI index   | 1.96                   | 2.98    | 0.007   | 0.063       | 0.29           |
|                     | NA ratio    | 35.76                  | 0.83    | 0.413   | 0.709       | 0.03           |
|                     | NA speed    | 0.37                   | 1.05    | 0.306   | 0.664       | 0.05           |
|                     | AR ratio    | -33.63                 | -0.71   | 0.488   | 0.709       | 0.02           |
|                     | AR speed    | -0.20                  | -0.67   | 0.512   | 0.709       | 0.02           |
|                     | AM ratio    | -10.49                 | -0.25   | 0.807   | 0.871       | 0.00           |
| +5 dB SNR           | ENI index   | 1.44                   | 3.11    | 0.005   | 0.063       | 0.31           |
|                     | NA ratio    | 24.52                  | 0.80    | 0.433   | 0.709       | 0.03           |
|                     | NA speed    | 0.28                   | 1.09    | 0.287   | 0.664       | 0.05           |
|                     | AR ratio    | 4.67                   | 0.14    | 0.894   | 0.894       | 0.00           |
|                     | AR speed    | -0.35                  | -1.70   | 0.103   | 0.464       | 0.12           |
|                     | AM ratio    | -9.04                  | -0.30   | 0.769   | 0.871       | 0.00           |

eCAP, electrically evoked compound action potential; SNR, signal-to-noise ratio; ENI, electrode neuron interface; NA, neural adaptation; AR, adaptation recovery; AM, amplitude modulation; FDR, false discovery rate
