# Supplementary material
Source: PubMed Central journal article supplement (PMC11587783)
Supplement: NIHMS2031158-supplement-Supplemental_2.pdf [file NIHMS2031158-supplement-Supplemental_2.pdf]

**TABLE B1.** Results of statistical models assessing the variance in CNC word scores measured in three listening conditions that was explained by six eCAP metrics.

| Listening condition | eCAP metric | Regression coefficient | T value | P value | FDR P value | R <sup>2</sup> |
|---------------------|-------------|------------------------|---------|---------|-------------|----------------|
|                     |             |                        |         |         |             | 0.29           |
| Quiet               | ENI index   | 0.67                   | 1.19    | 0.252   | 0.626       |                |
|                     | NA ratio    | 4.99                   | 0.14    | 0.888   | 0.919       |                |
|                     | NA speed    | 0.24                   | 1.00    | 0.330   | 0.626       |                |
|                     | AR ratio    | -20.04                 | -0.61   | 0.551   | 0.767       |                |
|                     | AR speed    | -0.37                  | -1.79   | 0.091   | 0.500       |                |
|                     | AM ratio    | -19.56                 | -0.60   | 0.554   | 0.767       |                |
|                     |             |                        |         |         |             | 0.33           |
| +10 dB SNR          | ENI index   | 0.81                   | 1.68    | 0.111   | 0.500       |                |
|                     | NA ratio    | -6.93                  | -0.23   | 0.819   | 0.919       |                |
|                     | NA speed    | 0.22                   | 1.08    | 0.294   | 0.626       |                |
|                     | AR ratio    | 3.31                   | 0.12    | 0.908   | 0.919       |                |
|                     | AR speed    | -0.27                  | -1.54   | 0.141   | 0.508       |                |
|                     | AM ratio    | -24.53                 | -0.88   | 0.389   | 0.637       |                |
|                     |             |                        |         |         |             | 0.57           |
| +5 dB SNR           | ENI index   | 1.15                   | 2.43    | 0.026   | 0.234       |                |
|                     | NA ratio    | -4.29                  | -0.15   | 0.885   | 0.919       |                |
|                     | NA speed    | 0.28                   | 1.42    | 0.173   | 0.519       |                |
|                     | AR ratio    | 2.84                   | 0.10    | 0.919   | 0.919       |                |
|                     | AR speed    | -0.56                  | -3.24   | 0.005   | 0.090       |                |
|                     | AM ratio    | -26.16                 | -0.97   | 0.348   | 0.626       |                |

eCAP, electrically evoked compound action potential; CNC, Consonant-Nucleus-Consonant; SNR, signal-to-noise ratio; ENI, electrode neuron interface; NA, neural adaptation; AR, adaptation recovery; AM, amplitude modulation; FDR, false discovery rate.

**TABLE B2.** Results of statistical models assessing the variance in AzBio sentence scores measured in three listening conditions that was explained by six eCAP metrics.

| Listening condition | eCAP metric | Regression coefficient | T value | P value | FDR P value | R <sup>2</sup> |
|---------------------|-------------|------------------------|---------|---------|-------------|----------------|
|                     |             |                        |         |         |             | 0.36           |
| Quiet               | ENI index   | 0.61                   | 1.31    | 0.206   | 0.530       |                |
|                     | NA ratio    | 21.28                  | 0.74    | 0.468   | 0.766       |                |
|                     | NA speed    | 0.23                   | 1.20    | 0.247   | 0.556       |                |
|                     | AR ratio    | -10.43                 | -0.39   | 0.705   | 0.977       |                |
|                     | AR speed    | -0.32                  | -1.91   | 0.073   | 0.392       |                |
|                     | AM ratio    | 5.43                   | 0.20    | 0.841   | 0.977       |                |
|                     |             |                        |         |         |             | 0.42           |
| +10 dB SNR          | ENI index   | 2.08                   | 2.69    | 0.016   | 0.144       |                |
|                     | NA ratio    | 3.85                   | 0.08    | 0.937   | 0.977       |                |
|                     | NA speed    | 0.511                  | 1.59    | 0.131   | 0.393       |                |
|                     | AR ratio    | -33.87                 | -0.75   | 0.463   | 0.766       |                |
|                     | AR speed    | -0.22                  | -0.79   | 0.441   | 0.766       |                |
|                     | AM ratio    | 5.59                   | 0.13    | 0.901   | 0.977       |                |
|                     |             |                        |         |         |             | 0.51           |
| +5 dB SNR           | ENI index   | 1.58                   | 3.11    | 0.006   | 0.108       |                |
|                     | NA ratio    | -1.46                  | -0.05   | 0.963   | 0.977       |                |
|                     | NA speed    | 0.36                   | 1.69    | 0.109   | 0.392       |                |
|                     | AR ratio    | -0.86                  | -0.03   | 0.977   | 0.977       |                |
|                     | AR speed    | -0.33                  | -1.77   | 0.094   | 0.392       |                |
|                     | AM ratio    | -2.24                  | -0.08   | 0.940   | 0.977       |                |

eCAP, electrically evoked compound action potential; SNR, signal-to-noise ratio; ENI, electrode neuron interface; NA, neural adaptation; AR, adaptation recovery; AM, amplitude modulation; FDR, false discovery rate.
